# Supplementary material
Source: PubMed Central journal article supplement (PMC8599041)

# t-SNE Plots for WT Samples

**A.**

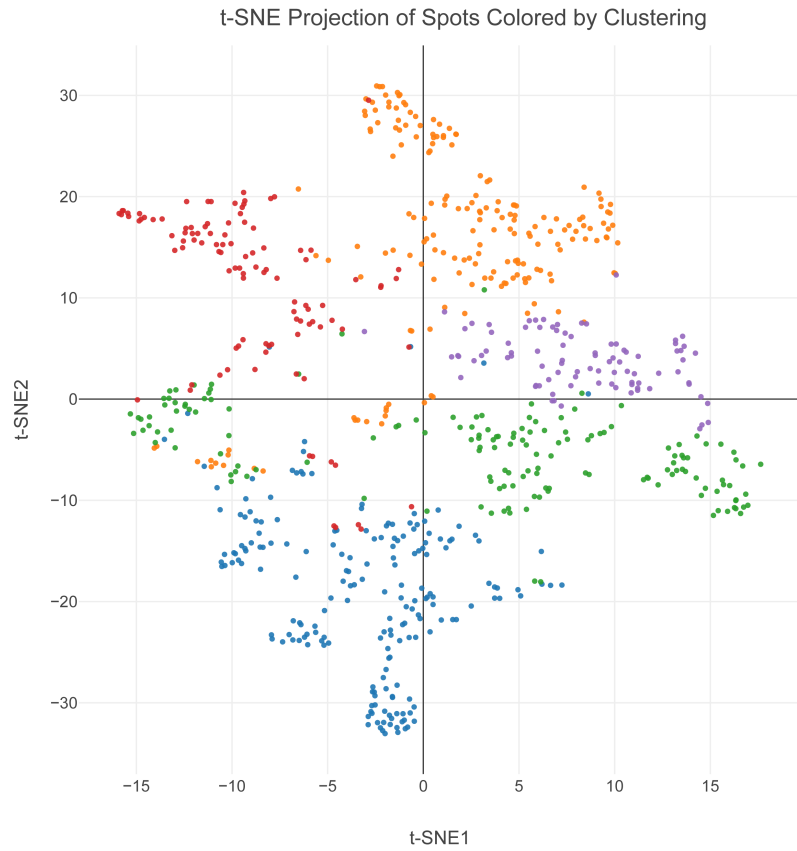

**All clusters**

**B.**

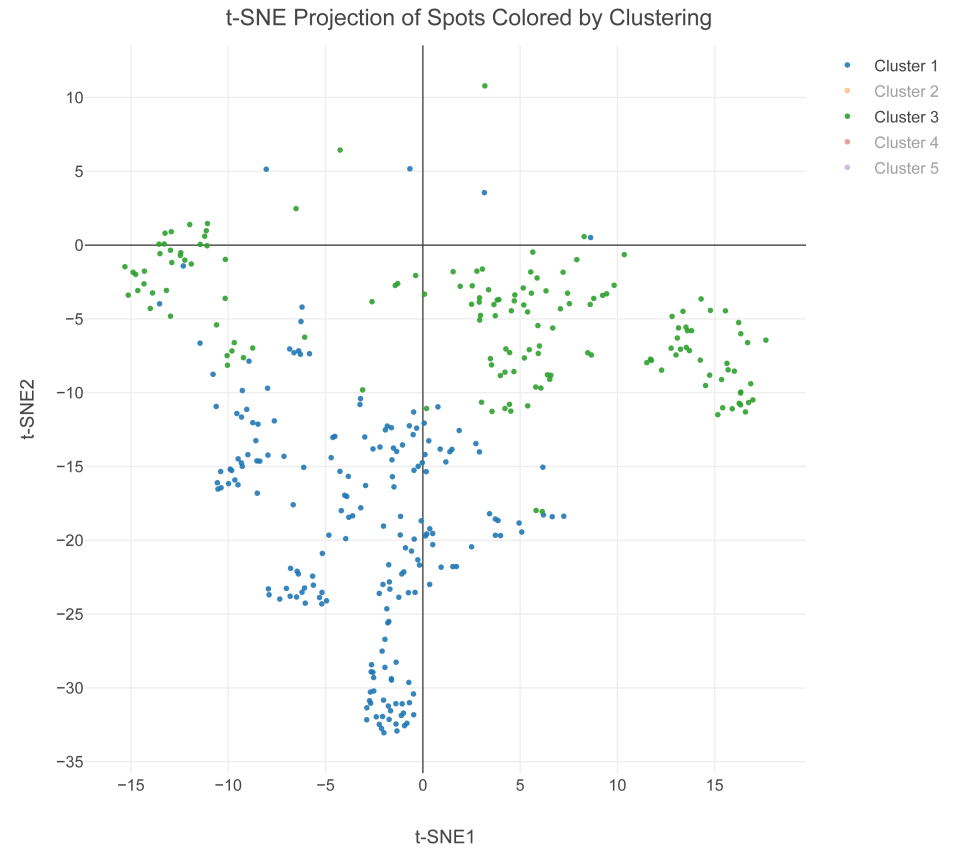

**Blue cluster and Green cluster**

Supplement: suppfigure3_ioab147.pdf [file suppfigure3_ioab147.pdf]

# t-SNE Plots for *Ezh2*cKO Group

**A.**

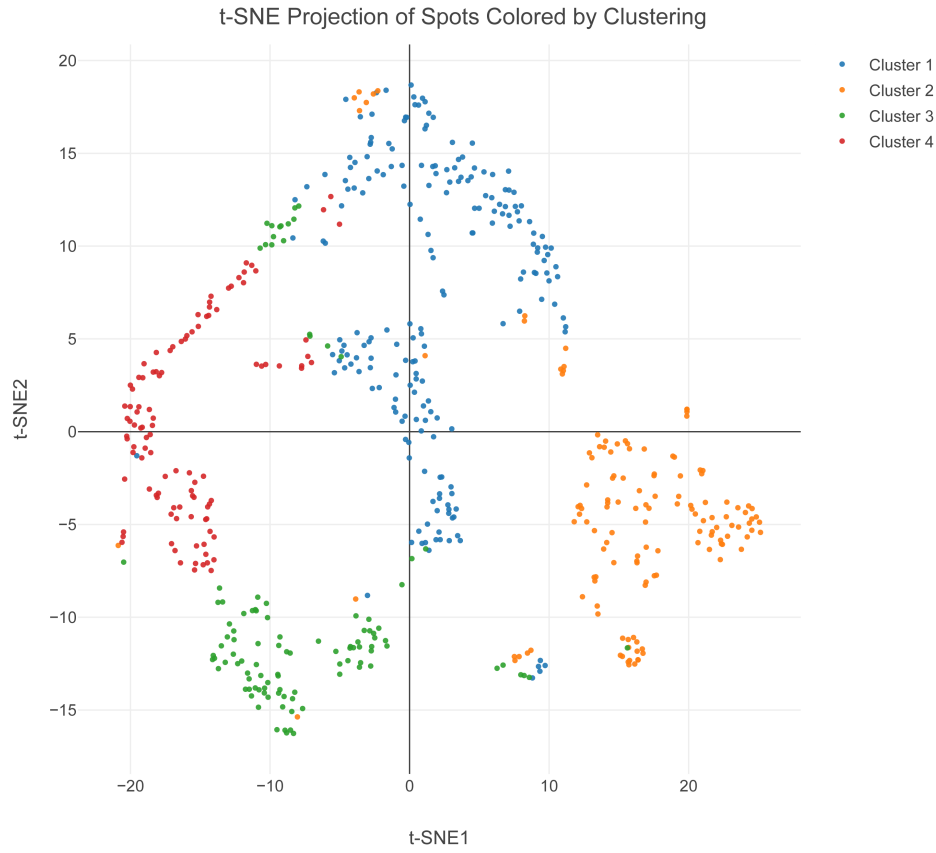

**All clusters**

**B.**

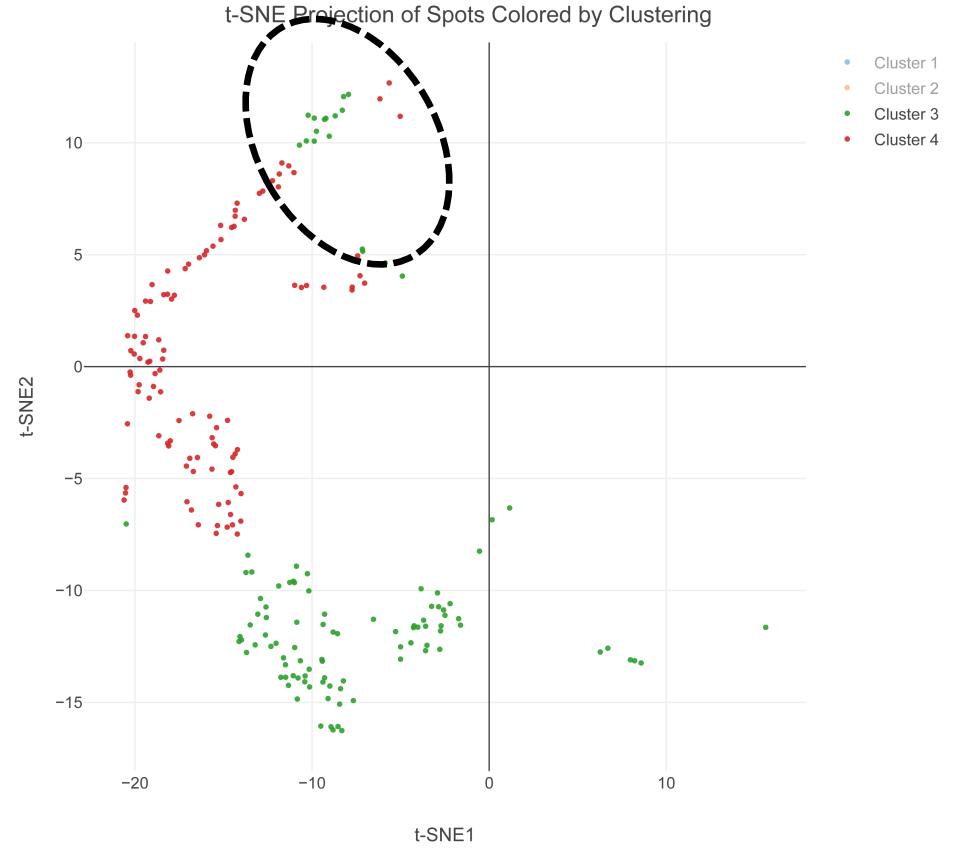

**Red cluster and Green cluster**

Supplement: suppfigure4_ioab147.pdf [file suppfigure4_ioab147.pdf]
